# Supplementary material for: Ce1−xFexVO4 with Improved Activity for Catalytic Reduction of NO with NH3
Source: MDPI journal article supplement (doi:10.3390/catal12050549), 2022-05-17
Supplement: s1 [file s1]

## **Supporting Information**

**Table S1.** The crystallographic data of  $\text{Ce}_{1-x}\text{Fe}_x\text{VO}_4$  samples, some of which were obtained using the Rietveld refinements.

| Samples              | $\text{CeVO}_4$ | $\text{Ce}_{0.75}\text{Fe}_{0.25}\text{VO}_4$ | $\text{Ce}_{0.50}\text{Fe}_{0.50}\text{VO}_4$ | $\text{Ce}_{0.25}\text{Fe}_{0.75}\text{VO}_4$ | $\text{FeVO}_4$ |
|----------------------|-----------------|-----------------------------------------------|-----------------------------------------------|-----------------------------------------------|-----------------|
| crystal system       | tetragonal      | tetragonal                                    | tetragonal                                    | tetragonal                                    | triclinic       |
| space group          | I41/amd         | I41/amd                                       | I41/amd                                       | I41/amd                                       | P-1             |
| cell formula units Z | 4               | 4                                             | 4                                             | 4                                             | 6               |
| $a/[\text{\AA}]$     | 7.39921         | 7.378008                                      | 7.354506                                      | 7.349089                                      | 6.71924         |
| $a/[\text{\AA}]$     | 7.39921         | 7.378008                                      | 7.354506                                      | 7.349089                                      | 8.06432         |
| $c/[\text{\AA}]$     | 6.496023        | 6.481832                                      | 6.478912                                      | 6.469042                                      | 9.25428         |
| $R_p$                | 19.9            | 27.5                                          | 20.3                                          | 31.0                                          | 30.6            |
| $R_{wp}$             | 19.8            | 22.7                                          | 17.4                                          | 26.7                                          | 27.8            |
| $R_{exp}$            | 23.79           | 33.30                                         | 30.82                                         | 31.41                                         | 32.83           |
| $\chi^2$             | 0.693           | 0.467                                         | 0.320                                         | 0.722                                         | 0.7188          |

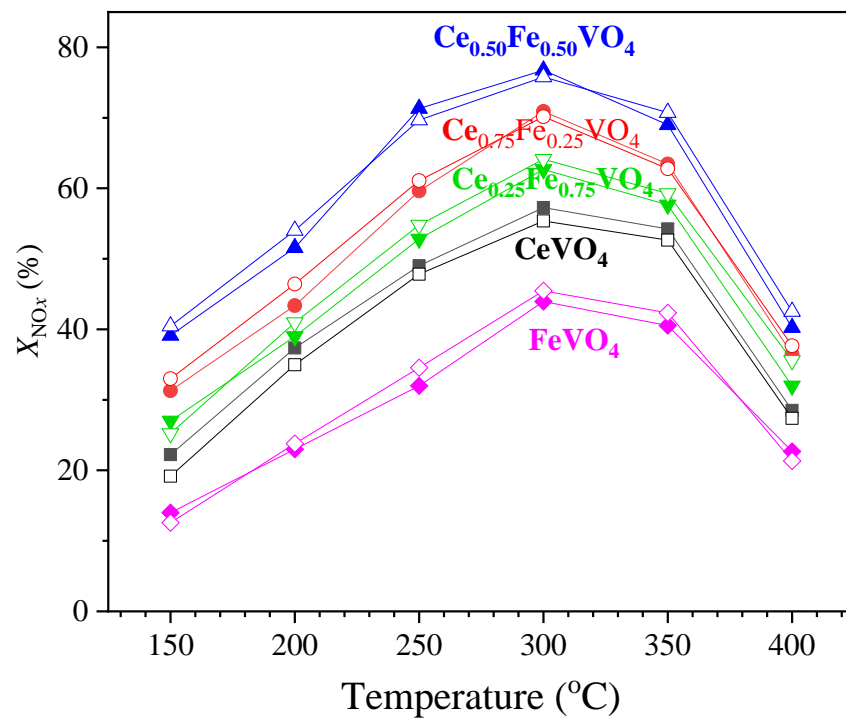

**Figure S1.**  $X_{\text{NO}_x}$  over  $\text{Ce}_{1-x}\text{Fe}_x\text{VO}_4$  catalysts prepared by a hydrothermal method. Reaction conditions:  $[\text{NO}] = 500 \text{ ppm}$ ,  $[\text{NH}_3] = 500 \text{ ppm}$ ,  $[\text{O}_2] = 3 \text{ vol. \%}$ , balance  $\text{N}_2$ ; catalyst weight: 200 mg; total flow rate:  $1000 \text{ mL} \cdot \text{min}^{-1}$ .

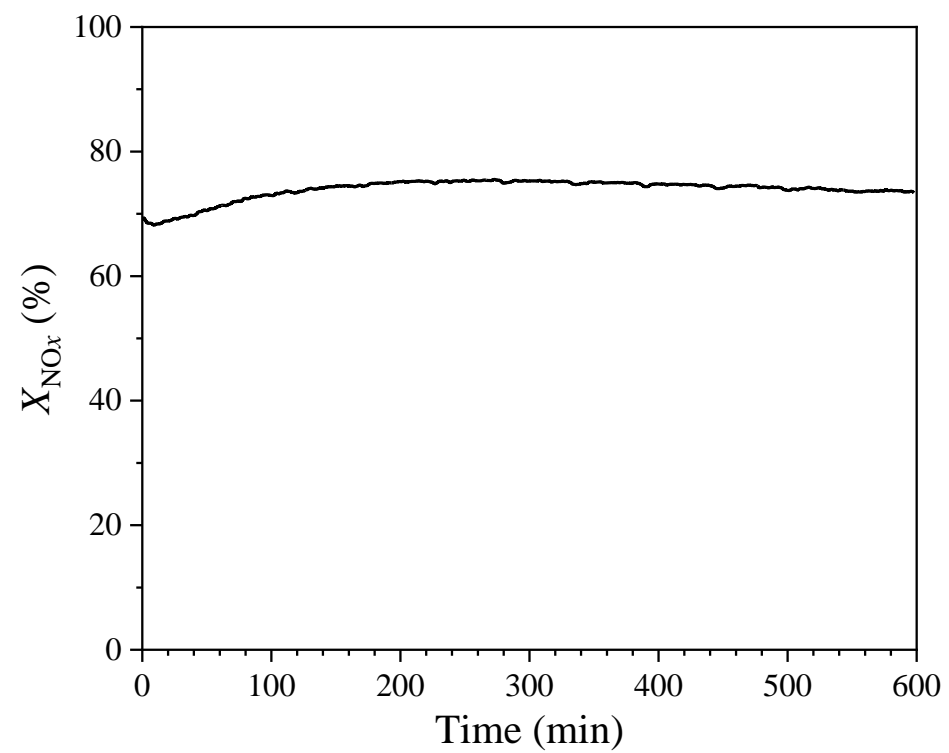

**Figure S2.**  $X_{\text{NOx}}$  over  $\text{Ce}_{0.5}\text{Fe}_{0.5}\text{VO}_4$  at 300 °C as a function of time on stream. Reaction conditions:  $[\text{NO}] = 500$  ppm,  $[\text{NH}_3] = 500$  ppm,  $[\text{O}_2] = 3$  vol. %, balance  $\text{N}_2$ ; catalyst weight: 200 mg; total flow rate:  $1000 \text{ mL} \cdot \text{min}^{-1}$ .

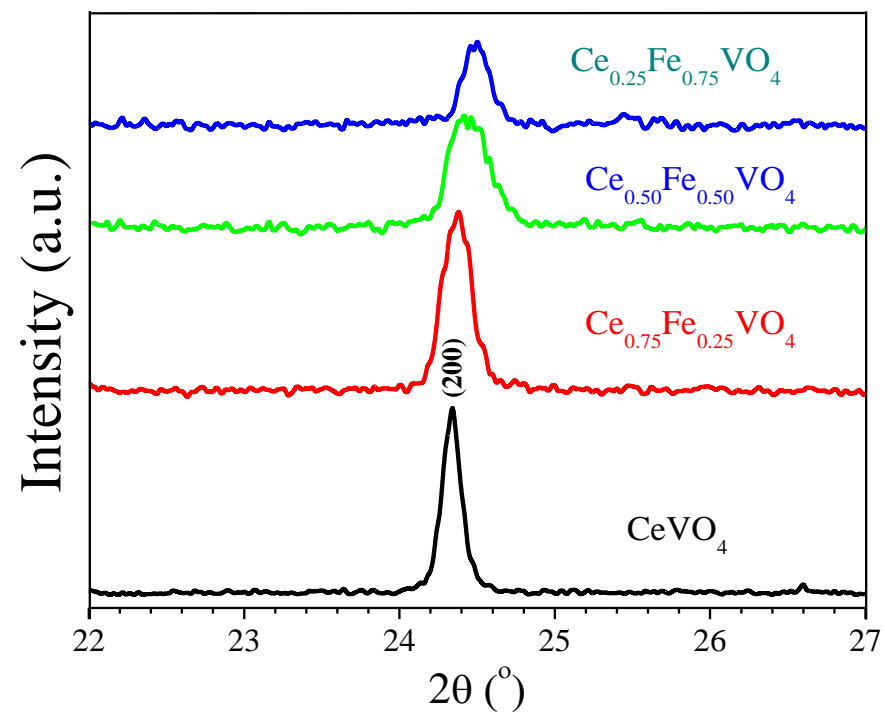

**Figure S3.** XRD patterns ( $2\theta = 22\text{--}27^\circ$ ) of  $\text{Ce}_{1-x}\text{Fe}_x\text{VO}_4$  catalysts.
